# Supplementary material for: Tailoring Crystal Phase of High-Entropy Alloy Nanoparticles via Redox-Mediated Engineering
Source: Research Square preprint supplement (doi:10.21203/rs.3.rs-8308350/v1), 2025-12-23
Supplement: Supplementary file 1 [file e0403ca11f457285c1d738f2.docx]

**Supplementary Information**

**Tailoring Crystal Phase of High-Entropy Alloy Nanoparticles via Redox-Mediated Engineering**

Yile Zhang1, Xingjie Peng2, Ziyue Zeng1, Wu Zhou2*, Mengqi Zeng1*, Lei Fu1,3*

1College of Chemistry and Molecular Sciences, Wuhan University, Wuhan 430072, China. 2School of Physical Sciences, University of Chinese Academy of Sciences, Beijing 100049, China. 3Institute for Advanced Studies, Wuhan University, Wuhan 430072, China.

*E-mail: leifu@whu.edu.cn; zengmq_lan@whu.edu.cn; wuzhou@ucas.ac.cn

**
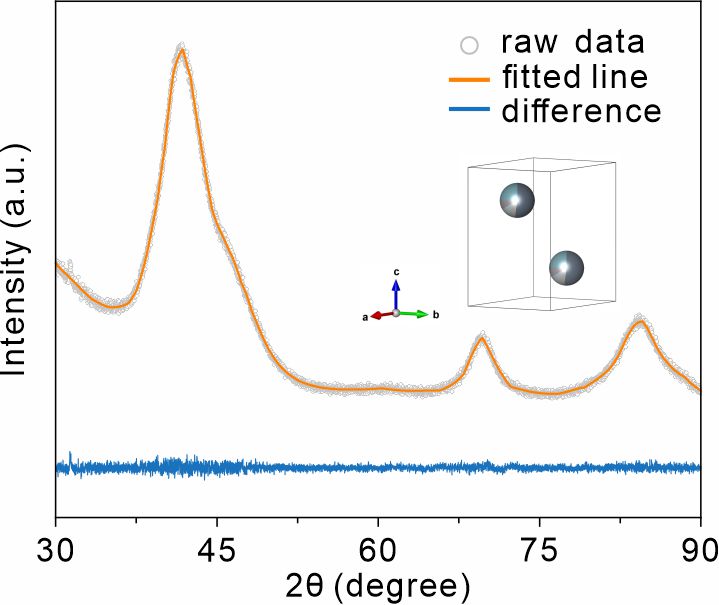
**

**Supplementary Fig. 1 | The fitting of XRD data of fcc-RuPtIrRhOs.** The inset shows the unit cell model.

**
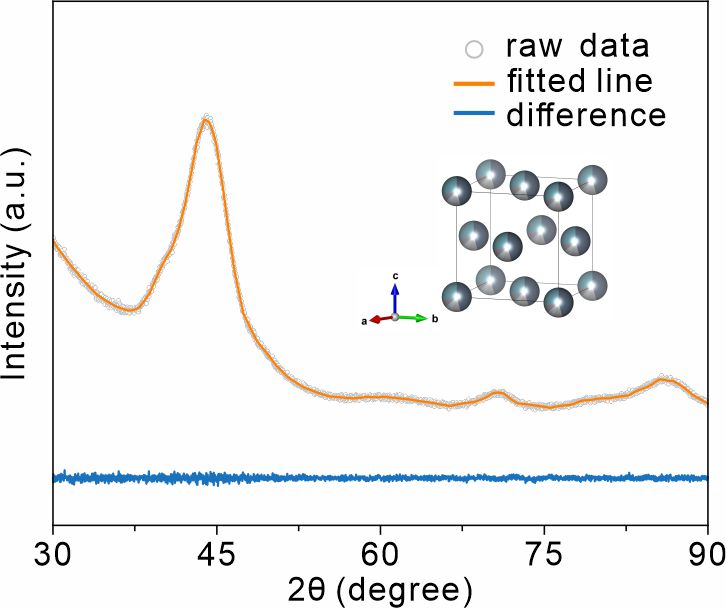
**

**Supplementary Fig. 2 | The fitting of XRD data of hcp-RuPtIrRhOs.** The inset shows the unit cell model.


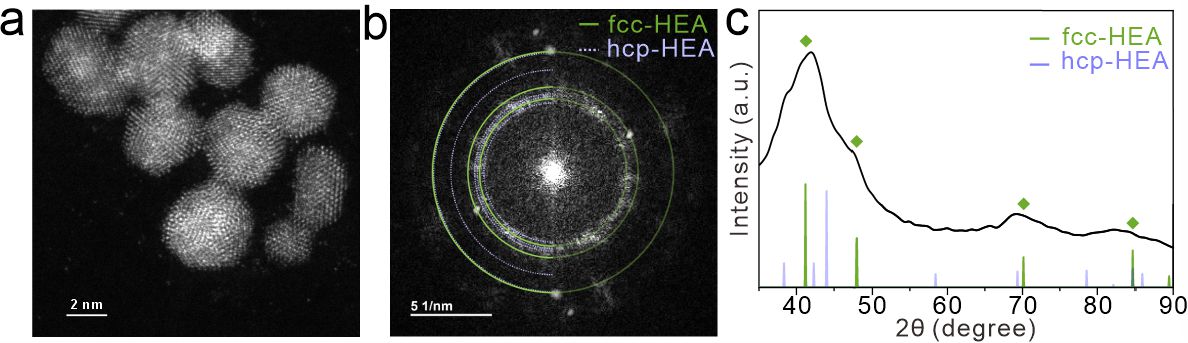


**Supplementary Fig. 3 | Structural characterization of multi-element fcc-RuPtIrRhOs nanoparticles.** (a) The high-angle annular dark-field scanning transmission electron microscopy (HAADF-STEM) image of multiple fcc-RuPtIrRhOs nanoparticles on a small scale, (b) the corresponding fast Fourier transform (FFT) pattern of (a), and (c) the radial intensity distribution of the FFT in (b).


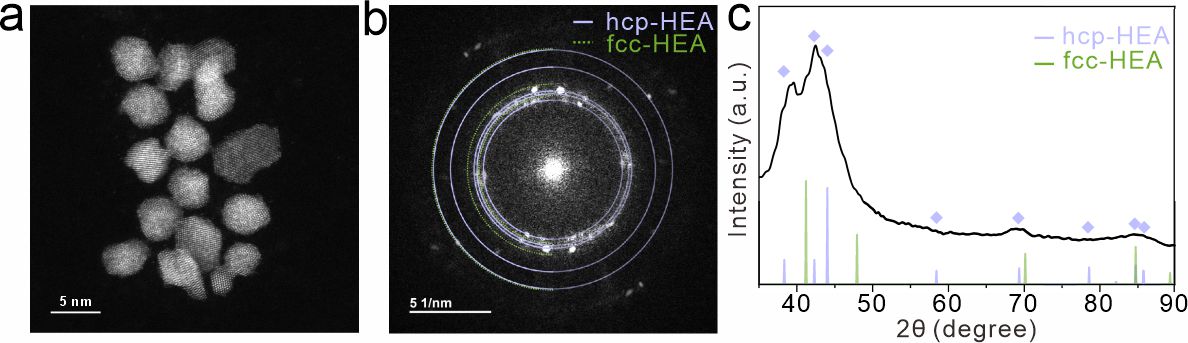


**Supplementary Fig. 4 | Structural characterization of multi-element hcp-RuPtIrRhOs nanoparticles.** (a) The HAADF-STEM image of of multiple hcp-RuPtIrRhOs nanoparticles on a small scale, (b) the corresponding FFT pattern of (a), and (c) the radial intensity distribution of the FFT in (b).


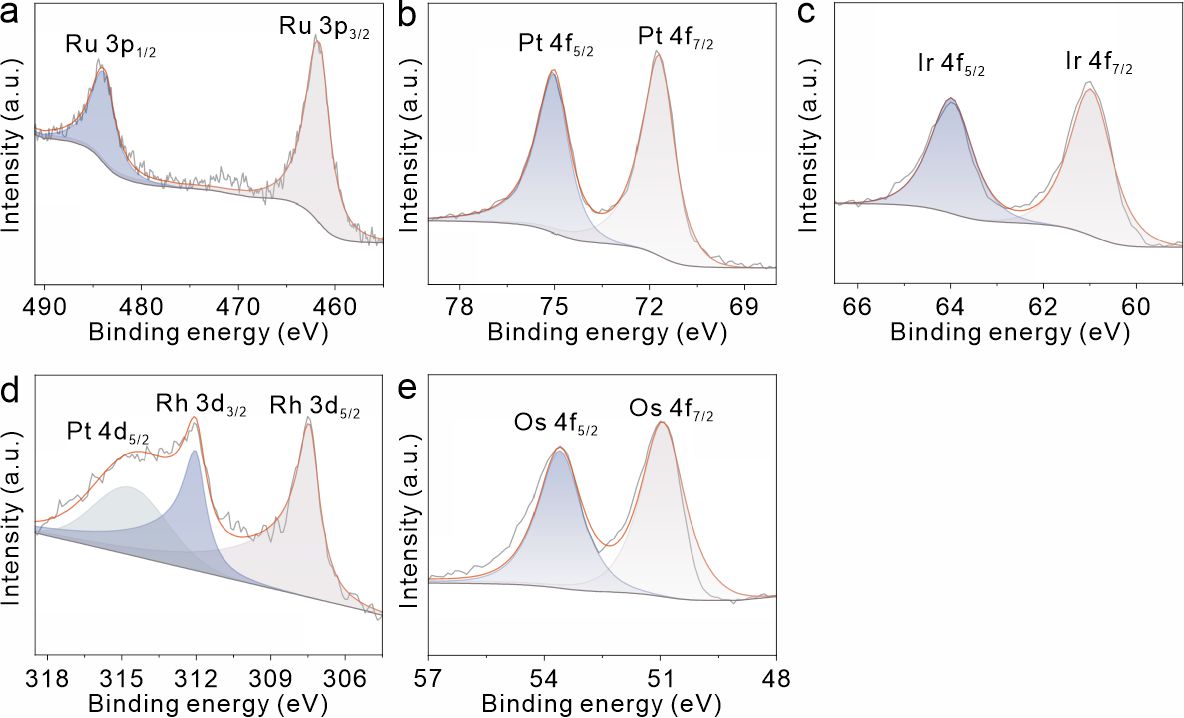


**Supplementary Fig. 5 | X-ray photoelectron spectroscopy (XPS) spectra of fcc-RuPtIrRhOs.** (a) Ru 3p, (b) Pt 4f, (c) Ir 4f, (d) Rh 3d, and (d) Os 4f.

**
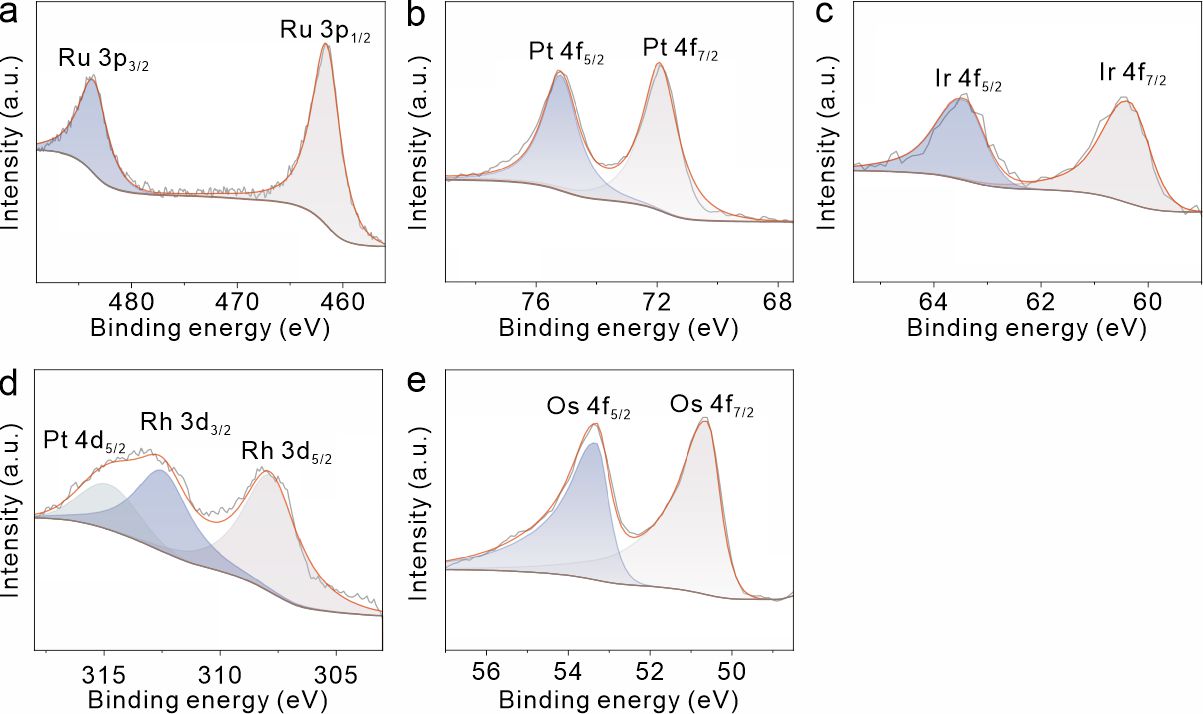
**

**Supplementary Fig. 6 | XPS spectra of hcp-RuPtIrRhOs.** (a) Ru 3p, (b) Pt 4f, (c) Ir 4f, (d) Rh 3d, and (d) Os 4f.

**
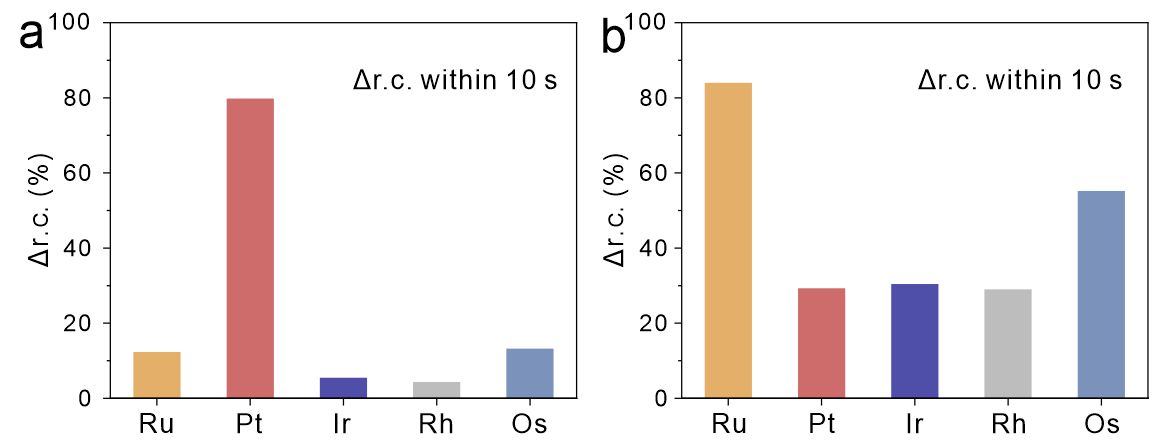
**

**Supplementary Fig. 7 | The average disparity in the relative concentration (∆r.c.) within 10 s of (a) fcc-RuPtIrRhOs and (b) hcp-RuPtIrRhOs.**


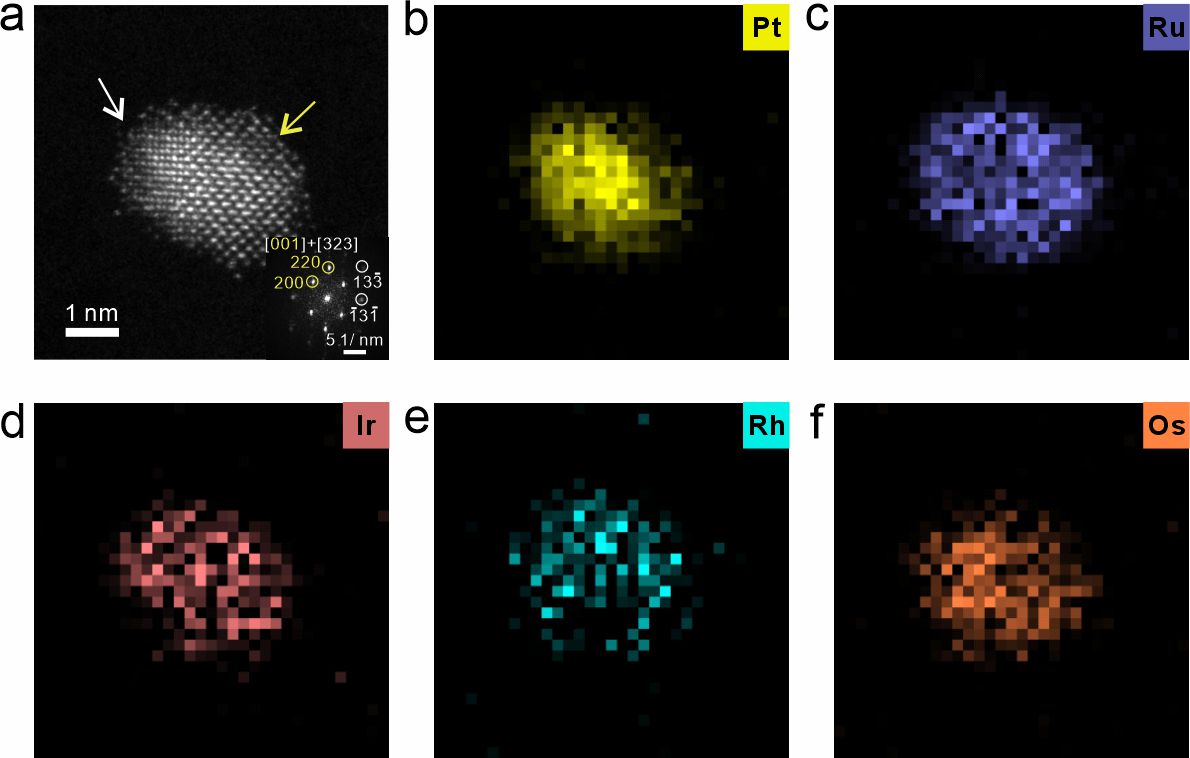


**Supplementary Fig. 8** **| Elemental maps of a fcc-RuPtIrRhOs nanoparticle.** (a) Atomic-resolution HAADF-STEM image. (b-f) STEM energy-dispersive X-ray spectroscopy (STEM-EDS) elemental maps of Ru, Pt, Ir, Rh, and Os, respectively.

**
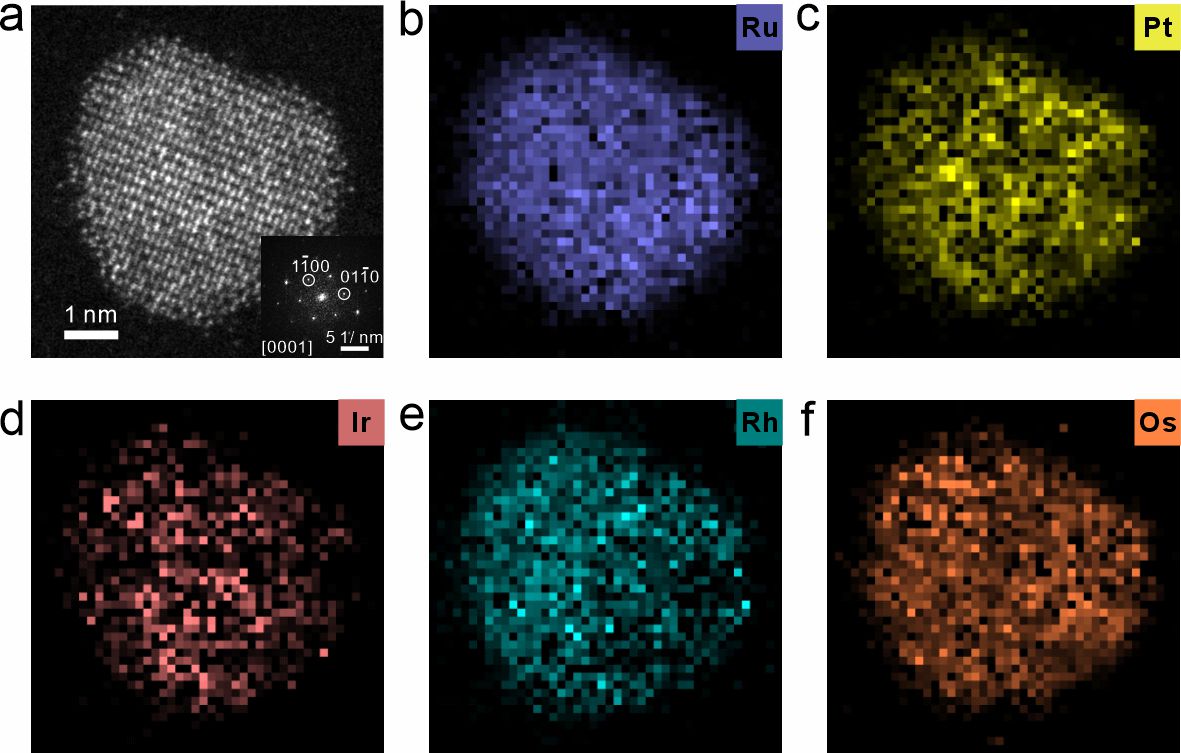
**

**Supplementary Fig. 9 | Elemental maps of a hcp-RuPtIrRhOs nanoparticle.** (a) Atomic-resolution HAADF-STEM image. (b–f) STEM energy-dispersive X-ray spectroscopy (STEM-EDS) elemental maps of Ru, Pt, Ir, Rh, and Os, respectively.


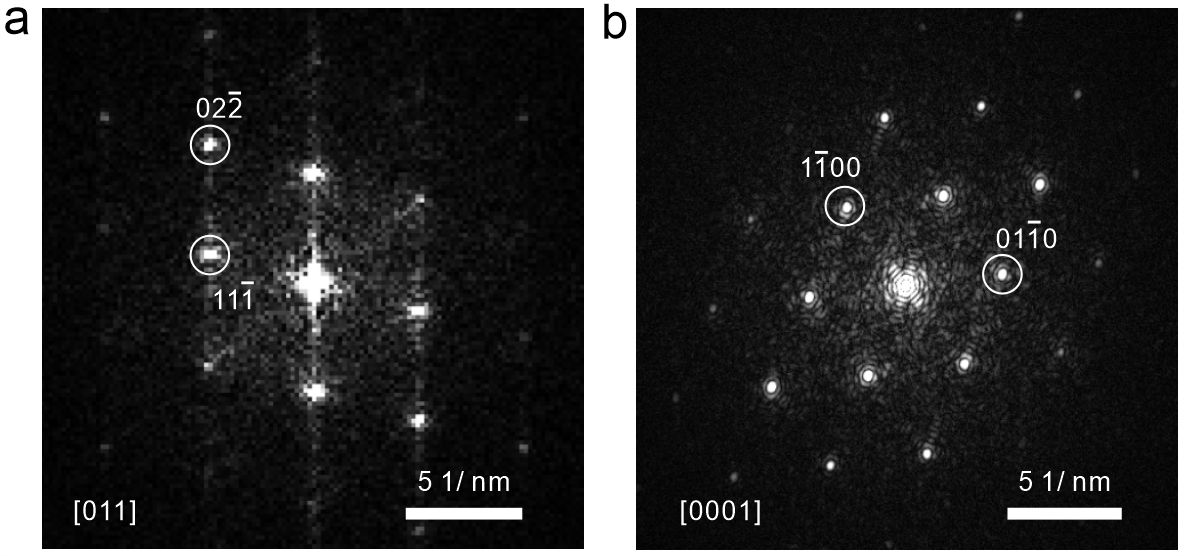


**Supplementary Fig. 10 |** **The corresponding FFT patterns of Figure 3(a) and 3(b), presenting fcc and hcp characteristics, respectively.**


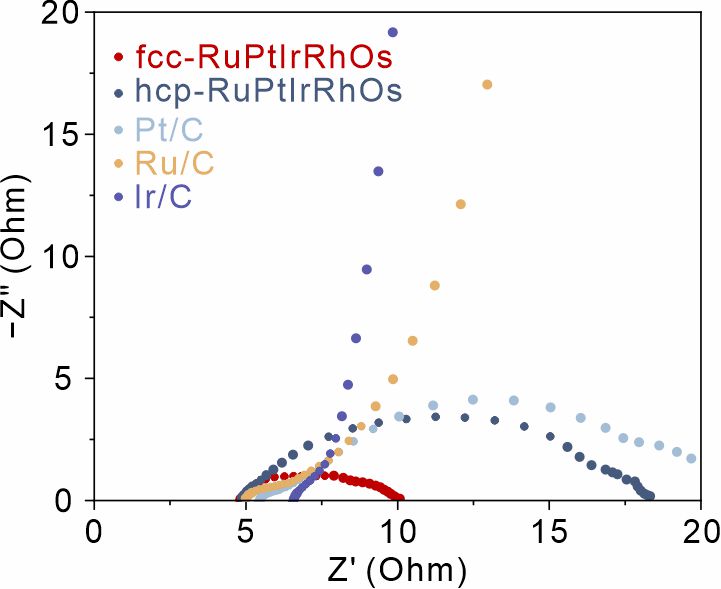


**Supplementary Fig. 11 |** **Electrochemical impedance spectroscopy plots of fcc-RuPtIrRhOs, hcp-RuPtIrRhOs, Pt/C, Ru/C and Ir/C.**

**
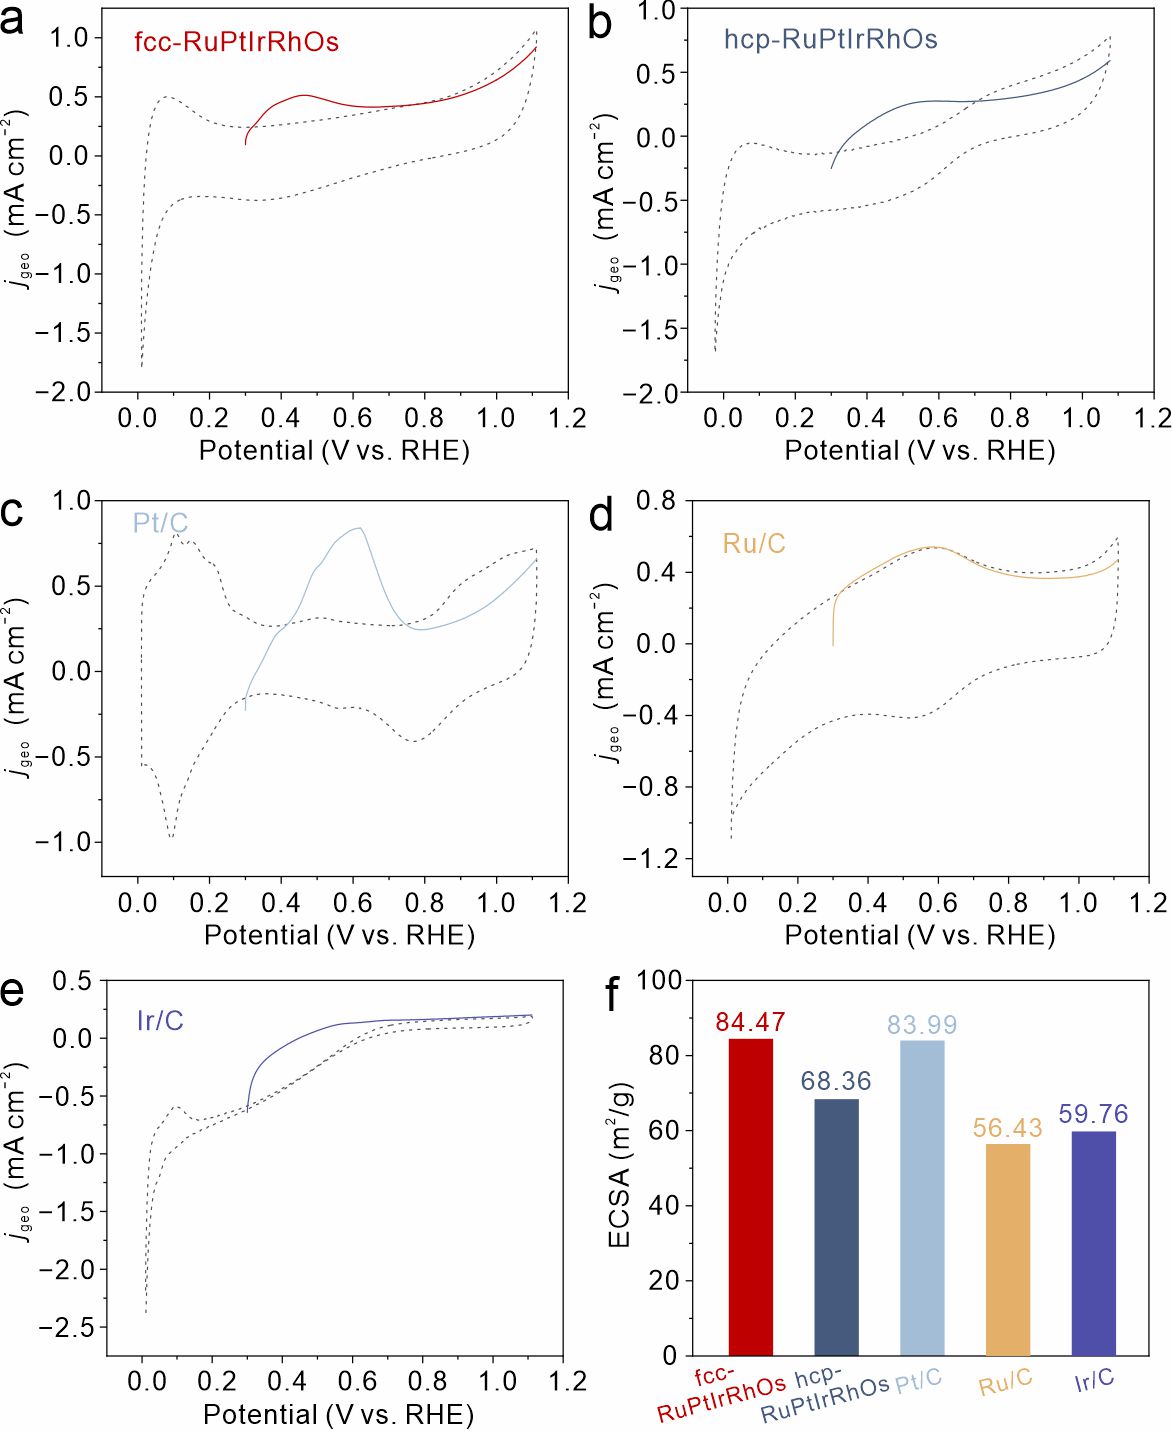
**

**Supplementary Fig. 12 | Electrochemical active surface area (ECSA) comparison of various catalysts.** Cyclic voltammetry curves (dashed lines, recorded in 0.5 M H2SO4 at 10 mV s−1) and Cu stripping curves (solid lines, recorded in 0.5 M H2SO4 and 5 mM CuSO4 at 10 mV s−1) of (a) fcc-RuPtIrRhOs, (b) hcp-RuPtIrRhOs, (c) Pt/C, (d) Ru/C and (e) Ir/C respectively and (f) the comparison of the ECSAs of the five catalysts.

**
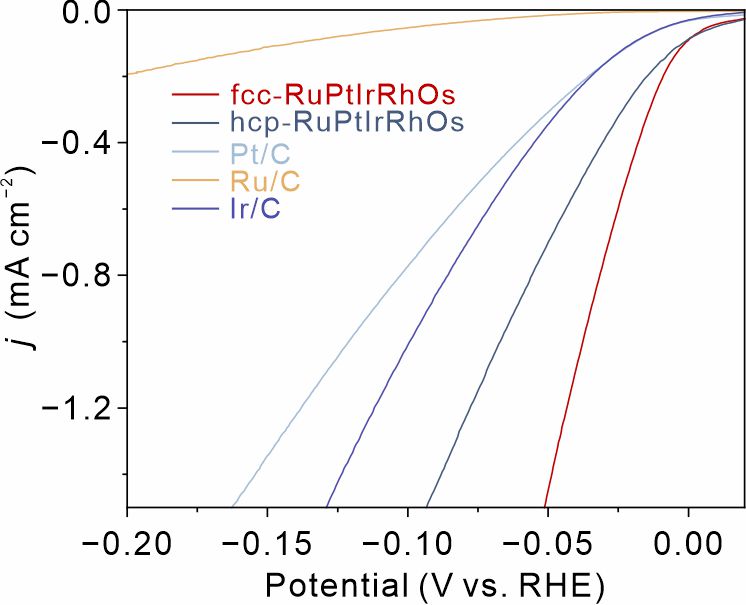
**

**Supplementary Fig. 13 | Polarization curves normalized by ECSAs.**

**
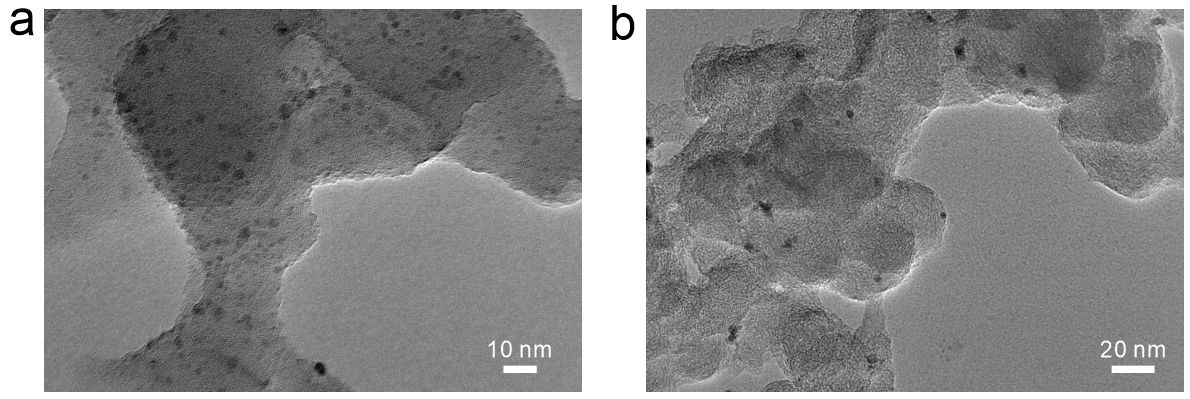
**

**Supplementary Fig. 14 | Structural characterization of fcc- and hcp-RuPtIrRhOs nanoparticles after durability testing.** Transmission electron microscopy images of (a) fcc-RuPtIrRhOs and (b) hcp-RuPtIrRhOs after 10,000 cycles of repeated catalytic electrocatalytic hydrogen evolution reaction measurements.

**Table S1.** Crystal data and structure refinement for fcc-RuPtIrRhOs of Fig. 2a.

| Temperature | 298 K |
| --- | --- |
| Wavelength | 1.5406 Å |
| Crystal system | Cubic |
| Space group | *F m* −3 *m* |
| Unit cell dimensions | *a* = *b* = *c* = 3.83008 Å;  *α* = *β* = *γ* = 90° |
| *Rωp* | 1.62% |
| *Rp* | 2.15% |
| *χ*2 | 0.928 |

**Table S2.** Crystal data and structure refinement for hcp-RuPtIrRhOs of Fig. 2c.

| Temperature | 298K |
| --- | --- |
| Wavelength | 1.5406 Å |
| Crystal system | Hexagonal |
| Space group | *P63/mmc* |
| Unit cell dimensions | *a* = *b* = 4.1145(9) Å, *c* = 5.1410(4) Å*;*  *α = β = 90°, γ = 120°* |
| *Rωp* | 1.11% |
| *Rp* | 1.48% |
| *χ*2 | 0.972 |

**Table S3.** XPS binding energy (eV) of the metallic component of each element in fcc-RuPtIrRhOs and hcp-RuPtIrRhOs, along with the reference value for comparison.

|  | **Ru 3p3/2** | **Pt 4f7/2** | **Ir 4f7/2** | **Rh 3d5/2** | **Os 4f7/2** |
| --- | --- | --- | --- | --- | --- |
| fcc-RuPtIrRhOs | 461.6 | 71.7 | 61.0 | 307.5 | 51.0 |
| hcp-RuPtIrRhOs | 461.6 | 71.9 | 60.4 | 307.8 | 50.6 |
| Referencea) | 460.0 | 71.2 | 61.5 | 307.0 | 57.0 |

a)The reference value corresponding to the metallic state of each element was obtained from the Handbook of X-ray Photoelectron Spectroscopy. Modulder, J. F.; Stickle, W. F.; Sobol, P. E.; Bomben, K. D. Perkin Elmer Corp. 1992.

**Table S4.** The inductively coupled plasma-optical emission spectrometry (ICP-OES) analysis of fcc-RuPtIrRhOs and hcp-RuPtIrRhOs.

|  | **Ru** | **Pt** | **Ir** | **Rh** | **Os** |
| --- | --- | --- | --- | --- | --- |
| fcc-RuPtIrRhOs (at%) | 45.64 | 9.33 | 7.57 | 7.62 | 29.84 |
| hcp-RuPtIrRhOs (at%) | 52.37 | 7.51 | 7.21 | 7.95 | 24.96 |

**Table S5.** The relative concentration (r.c.) of Mx+ remained in fcc-RuPtIrRhOs solution relative to the initial concentration versus reaction time.

| **fcc-RuPtIrRhOs** | **Count** | **Ru (r.c./%)** | **Pt (r.c./%)** | **Ir (r.c./%)** | **Rh (r.c./%)** | **Os (r.c./%)** |
| --- | --- | --- | --- | --- | --- | --- |
| 0 s | 1 | 100 | 100 | 100 | 100 | 100 |
| 10 s | 1 | 88.66 | 24.31 | 94.86 | 95.35 | 92.40 |
| 2 | 89.30 | 18.93 | 94.10 | 95.31 | 82.99 |
| 3 | 85.06 | 17.29 | 95.35 | 96.33 | 84.97 |
| 40 s | 1 | 64.38 | 6.26 | 47.35 | 89.57 | 77.78 |
| 2 | 86.30 | 1.13 | 40.40 | 91.86 | 70.03 |
| 3 | 70.82 | 2.66 | 40.32 | 98.57 | 81.45 |
| 120 s | 1 | 19.95 | 3.06 | 10.78 | 37.07 | 77.78 |
| 2 | 13.37 | 0 | 8.68 | 38.90 | 60.95 |
| 3 | 21.26 | 0 | 12.23 | 56.53 | 63.22 |

**Table S5.** The relative concentration (r.c.) of Mx+ remained in hcp-RuPtIrRhOs solution relative to the initial concentration versus reaction time.

| **hcp-RuPtIrRhOs** | **Count** | **Ru (r.c./%)** | **Pt (r.c./%)** | **Ir (r.c./%)** | **Rh (r.c./%)** | **Os (r.c./%)** |
| --- | --- | --- | --- | --- | --- | --- |
| 0 s | 1 | 100 | 100 | 100 | 100 | 100 |
| 10 s | 1 | 16.43 | 66.57 | 83.93 | 66.73 | 40.82 |
| 2 | 6.85 | 74.44 | 64.82 | 65.71 | 44.09 |
| 3 | 18.80 | 71.09 | 59.93 | 80.45 | 49.48 |
| 40 s | 1 | 7.41 | 59.64 | 17.71 | 55.31 | 18.27 |
| 2 | 7.63 | 57.58 | 31.45 | 59.19 | 17.77 |
| 3 | 16.75 | 55.27 | 31.02 | 71.49 | 22.61 |
| 120 s | 1 | 5.20 | 23.65 | 2.34 | 44.78 | 9.58 |
| 2 | 10.20 | 27.19 | 5.57 | 37.15 | 7.38 |
| 3 | 7.45 | 21.47 | 2.52 | 40.33 | 8.27 |

**Table S7.** The average disparity in the relative concentration (∆r.c.) of fcc-RuPtIrRhOs and hcp-RuPtIrRhOs solution in different reaction time.

| **fcc-RuPtIrRhOs** | **Ru (∆r.c./%)** | **Pt (∆r.c./%)** | **Ir (∆r.c./%)** | **Rh (∆r.c./%)** | **Os (∆r.c./%)** |
| --- | --- | --- | --- | --- | --- |
| 0−10 s | 12.33 | 79.82 | 5.51 | 4.34 | 13.21 |
| 10−40 s | 13.84 | 16.83 | 51.92 | 2.33 | 10.36 |
| 40−120 s | 55.64 | 2.33 | 32.01 | 49.17 | 9.10 |
| **hcp-RuPtIrRhOs** | **Ru (∆r.c./%)** | **Pt (∆r.c./%)** | **Ir (∆r.c./%)** | **Rh (∆r.c./%)** | **Os (∆r.c./%)** |
| 0−10 s | 83.97 | 29.30 | 30.44 | 29.04 | 55.20 |
| 10−40 s | 3.43 | 13.20 | 42.83 | 8.97 | 25.25 |
| 40−120 s | 2.98 | 33.39 | 23.25 | 21.24 | 11.14 |
